# Supplementary material for: An evaluation of ozone dry deposition in global scale chemistry climate models
Source: Copernicus journal article supplement (doi:10.5194/acp-15-6419-2015), 2015-06-12
Supplement: Supplementary file 1 [file acp-15-6419-2015-supplement.zip]

### Statistics for O3 dry deposition flux at FOREST sites

| Site code | Site Lat | Site Lon | Parameter | LCC | R-value | r^2    | Slope |
|-----------|----------|----------|-----------|-----|---------|--------|-------|
| CNT169    | 41.36    | -106.24  | flux      | CF  | 0.93    | 0.8649 | 2.31  |
| DEN417    | 63.72    | -148.97  | flux      | CF  | -0.11   | 0.0121 | -0.03 |
| MOR409    | 46.76    | -122.12  | flux      | CF  | 0.61    | 0.3721 | 0.14  |
| PED108    | 37.17    | -78.31   | flux      | CF  | 0.97    | 0.9409 | 1.01  |
| POF425    | 65.12    | -147.43  | flux      | CF  | -       | -      | -     |
| SEK402    | 36.43    | -118.76  | flux      | CF  | -0.73   | 0.5329 | -0.07 |
| CDR119    | 38.88    | -80.85   | flux      | DF  | 0.97    | 0.9409 | 1.15  |
| KEF112    | 41.6     | -78.77   | flux      | DF  | 0.94    | 0.8836 | 0.88  |
| LCW121    | 37.13    | -82.99   | flux      | DF  | 0.97    | 0.9409 | 1.43  |
| LYE145    | 43.05    | -73.06   | flux      | DF  | -       | -      | -     |
| MKG113    | 41.43    | -80.15   | flux      | DF  | 0.96    | 0.9216 | 1.22  |
| ONL102    | 35.96    | -84.29   | flux      | DF  | -       | -      | -     |
| PAR107    | 39.09    | -79.66   | flux      | DF  | 0.96    | 0.9216 | 0.86  |
| PRK134    | 45.21    | -90.6    | flux      | DF  | 0.92    | 0.8464 | 1.32  |
| SHN418    | 38.52    | -78.43   | flux      | DF  | 0.9     | 0.81   | 0.7   |
| VPI120    | 37.33    | -80.56   | flux      | DF  | 0.93    | 0.8649 | 0.79  |
| WFM105    | 44.39    | -73.86   | flux      | DF  | 0.91    | 0.8281 | 1.19  |
| WPA103    | 41.35    | -74.05   | flux      | DF  | -       | -      | -     |
| WPB104    | 41.35    | -74.05   | flux      | DF  | 0.93    | 0.8649 | 0.83  |
| WST109    | 43.94    | -71.7    | flux      | DF  | 0.9     | 0.81   | 1.69  |
| ACA416    | 44.38    | -68.26   | flux      | FO  | 0.97    | 0.9409 | 1.81  |
| ALH157    | 38.87    | -89.62   | flux      | FO  | 0.96    | 0.9216 | 1.72  |
| ANA115    | 42.42    | -83.9    | flux      | FO  | 0.97    | 0.9409 | 1.89  |
| BEL116    | 39.03    | -76.82   | flux      | FO  | 0.99    | 0.9801 | 1.47  |
| BWR139    | 38.44    | -76.11   | flux      | FO  | 0.95    | 0.9025 | 0.81  |
| CAD150    | 34.18    | -93.1    | flux      | FO  | 0.95    | 0.9025 | 1.69  |
| CAT175    | 41.94    | -74.55   | flux      | FO  | -       | -      | -     |
| CND125    | 35.26    | -79.84   | flux      | FO  | 0.97    | 0.9409 | 0.87  |
| COW137    | 35.06    | -83.43   | flux      | FO  | 0.96    | 0.9216 | 1.65  |
| CTH110    | 42.4     | -76.65   | flux      | FO  | 0.95    | 0.9025 | 0.81  |
| ESP127    | 36.04    | -85.73   | flux      | FO  | 0.98    | 0.9604 | 1.93  |
| GLR468    | 48.51    | -114     | flux      | FO  | 0.77    | 0.5929 | 1.04  |
| GRC474    | 36.06    | -112.18  | flux      | FO  | 0.77    | 0.5929 | 0.23  |
| GRS420    | 35.63    | -83.94   | flux      | FO  | 0.94    | 0.8836 | 0.83  |
| HOW132    | 45.22    | -68.71   | flux      | FO  | 0.92    | 0.8464 | 1.63  |
| HOX148    | 44.18    | -85.74   | flux      | FO  | 0.96    | 0.9216 | 1.9   |
| HWF187    | 43.97    | -74.22   | flux      | FO  | 0.96    | 0.9216 | 3.09  |
| LAV410    | 40.54    | -121.58  | flux      | FO  | -0.59   | 0.3481 | -0.11 |
| LRL117    | 39.99    | -79.25   | flux      | FO  | 0.98    | 0.9604 | 0.83  |
| NCS415    | 48.54    | -121.45  | flux      | FO  | 0.69    | 0.4761 | 0.46  |
| OLY421    | 48.1     | -123.43  | flux      | FO  | -       | -      | -     |
| PNF126    | 36.11    | -82.05   | flux      | FO  | 0.91    | 0.8281 | 0.65  |
| ROM406    | 40.28    | -105.55  | flux      | FO  | 0.91    | 0.8281 | 2.39  |
| SUM156    | 30.11    | -84.99   | flux      | FO  | 0.93    | 0.8649 | 2.03  |
| VOY413    | 48.41    | -92.83   | flux      | FO  | 0.93    | 0.8649 | 1.29  |
| WEL149    | 44.22    | -85.82   | flux      | FO  | 0.97    | 0.9409 | 2.12  |
| YOS404    | 37.71    | -119.7   | flux      | FO  | -0.67   | 0.4489 | -0.18 |
|           |          |          |           |     |         |        |       |

### Statistics for O3 dry deposition velocity at FOREST sites

| Site code | Site Lat | Site Lon | Parameter | LCC | R-value | r^2 | Slope |
|-----------|----------|----------|-----------|-----|---------|-----|-------|
|-----------|----------|----------|-----------|-----|---------|-----|-------|

|        |       |         |      |    |       |        |       |
|--------|-------|---------|------|----|-------|--------|-------|
| CNT169 | 41.36 | -106.24 | dvel | CF | 0.73  | 0.5329 | 1.49  |
| DEN417 | 63.72 | -148.97 | dvel | CF | -0.22 | 0.0484 | -0.01 |
| MOR409 | 46.76 | -122.12 | dvel | CF | 0.58  | 0.3364 | 0.12  |
| PED108 | 37.17 | -78.31  | dvel | CF | 0.88  | 0.7744 | 0.54  |
| POF425 | 65.12 | -147.43 | dvel | CF | -     | -      | -     |
| SEK402 | 36.43 | -118.76 | dvel | CF | -0.62 | 0.3844 | -0.03 |
| CDR119 | 38.88 | -80.85  | dvel | DF | 0.9   | 0.81   | 0.53  |
| KEF112 | 41.6  | -78.77  | dvel | DF | 0.79  | 0.6241 | 0.58  |
| LCW121 | 37.13 | -82.99  | dvel | DF | 0.81  | 0.6561 | 0.35  |
| LYE145 | 43.05 | -73.06  | dvel | DF | -     | -      | -     |
| MKG113 | 41.43 | -80.15  | dvel | DF | 0.84  | 0.7056 | 0.79  |
| ONL102 | 35.96 | -84.29  | dvel | DF | -     | -      | -     |
| PAR107 | 39.09 | -79.66  | dvel | DF | 0.85  | 0.7225 | 0.48  |
| PRK134 | 45.21 | -90.6   | dvel | DF | 0.84  | 0.7056 | 1.02  |
| SHN418 | 38.52 | -78.43  | dvel | DF | 0.67  | 0.4489 | 0.47  |
| VPI120 | 37.33 | -80.56  | dvel | DF | 0.7   | 0.49   | 0.43  |
| WFM105 | 44.39 | -73.86  | dvel | DF | 0.7   | 0.49   | 0.74  |
| WPA103 | 41.35 | -74.05  | dvel | DF | -     | -      | -     |
| WPB104 | 41.35 | -74.05  | dvel | DF | 0.85  | 0.7225 | 0.59  |
| WST109 | 43.94 | -71.7   | dvel | DF | 0.78  | 0.6084 | 0.8   |
| ALH157 | 38.87 | -89.62  | dvel | FO | 0.79  | 0.6241 | 0.99  |
| ANA115 | 42.42 | -83.9   | dvel | FO | 0.88  | 0.7744 | 1.5   |
| BEL116 | 39.03 | -76.82  | dvel | FO | 0.88  | 0.7744 | 1.2   |
| BWR139 | 38.44 | -76.11  | dvel | FO | 0.88  | 0.7744 | 0.74  |
| CAD150 | 34.18 | -93.1   | dvel | FO | 0.93  | 0.8649 | 0.55  |
| CAT175 | 41.94 | -74.55  | dvel | FO | -     | -      | -     |
| CND125 | 35.26 | -79.84  | dvel | FO | 0.67  | 0.4489 | 0.26  |
| COW137 | 35.06 | -83.43  | dvel | FO | 0.66  | 0.4356 | 0.3   |
| CTH110 | 42.4  | -76.65  | dvel | FO | 0.86  | 0.7396 | 0.78  |
| ESP127 | 36.04 | -85.73  | dvel | FO | 0.94  | 0.8836 | 1.1   |
| GLR468 | 48.51 | -114    | dvel | FO | 0.87  | 0.7569 | 1.19  |
| GRC474 | 36.06 | -112.18 | dvel | FO | -0.13 | 0.0169 | -0.06 |
| GRS420 | 35.63 | -83.94  | dvel | FO | 0.69  | 0.4761 | 0.38  |
| HOW132 | 45.22 | -68.71  | dvel | FO | 0.94  | 0.8836 | 1.39  |
| HOX148 | 44.18 | -85.74  | dvel | FO | 0.87  | 0.7569 | 1.17  |
| HWF187 | 43.97 | -74.22  | dvel | FO | 0.83  | 0.6889 | 1.4   |
| LAV410 | 40.54 | -121.58 | dvel | FO | -0.59 | 0.3481 | -0.04 |
| LRL117 | 39.99 | -79.25  | dvel | FO | 0.9   | 0.81   | 0.52  |
| NCS415 | 48.54 | -121.45 | dvel | FO | 0.8   | 0.64   | 0.53  |
| OLY421 | 48.1  | -123.43 | dvel | FO | -     | -      | -     |
| PNF126 | 36.11 | -82.05  | dvel | FO | 0.64  | 0.4096 | 0.29  |
| ROM406 | 40.28 | -105.55 | dvel | FO | 0.72  | 0.5184 | 1.37  |
| SUM156 | 30.11 | -84.99  | dvel | FO | 0.53  | 0.2809 | 0.3   |
| VOY413 | 48.41 | -92.83  | dvel | FO | 0.94  | 0.8836 | 1.53  |
| WEL149 | 44.22 | -85.82  | dvel | FO | 0.92  | 0.8464 | 1.68  |
| YOS404 | 37.71 | -119.7  | dvel | FO | -0.47 | 0.2209 | -0.1  |
|        |       |         |      |    |       |        |       |

#### Statistics for surface O3 at FOREST sites

| Site code | Site Lat | Site Lon | Parameter | LCC | R-value | r^2    | Slope |
|-----------|----------|----------|-----------|-----|---------|--------|-------|
| CNT169    | 41.36    | -106.24  | surf      | CF  | 0.81    | 0.6561 | 2.58  |
| DEN417    | 63.72    | -148.97  | surf      | CF  | 0.93    | 0.8649 | 0.68  |
| MOR409    | 46.76    | -122.12  | surf      | CF  | 0.66    | 0.4356 | 0.44  |
| PED108    | 37.17    | -78.31   | surf      | CF  | 0.71    | 0.5041 | 0.86  |

|        |       |         |      |    |       |        |       |
|--------|-------|---------|------|----|-------|--------|-------|
| POF425 | 65.12 | -147.43 | surf | CF | -     | -      | -     |
| SEK402 | 36.43 | -118.76 | surf | CF | -0.59 | 0.3481 | -0.23 |
| CDR119 | 38.88 | -80.85  | surf | DF | 0.69  | 0.4761 | 1.02  |
| KEF112 | 41.6  | -78.77  | surf | DF | 0.79  | 0.6241 | 0.76  |
| LCW121 | 37.13 | -82.99  | surf | DF | 0.5   | 0.25   | 1.1   |
| LYE145 | 43.05 | -73.06  | surf | DF | -     | -      | -     |
| MKG113 | 41.43 | -80.15  | surf | DF | 0.87  | 0.7569 | 0.94  |
| ONL102 | 35.96 | -84.29  | surf | DF | -     | -      | -     |
| PAR107 | 39.09 | -79.66  | surf | DF | 0.75  | 0.5625 | 0.98  |
| PRK134 | 45.21 | -90.6   | surf | DF | 0.82  | 0.6724 | 0.84  |
| SHN418 | 38.52 | -78.43  | surf | DF | 0.95  | 0.9025 | 0.94  |
| VPI120 | 37.33 | -80.56  | surf | DF | 0.93  | 0.8649 | 1.09  |
| WFM105 | 44.39 | -73.86  | surf | DF | 0.47  | 0.2209 | 0.43  |
| WPA103 | 41.35 | -74.05  | surf | DF | -     | -      | -     |
| WPB104 | 41.35 | -74.05  | surf | DF | 0.88  | 0.7744 | 0.75  |
| WST109 | 43.94 | -71.7   | surf | DF | 0.24  | 0.0576 | 0.18  |
| ACA416 | 44.38 | -68.26  | dvel | FO | 0.92  | 0.8464 | 1.62  |
| ACA416 | 44.38 | -68.26  | surf | FO | 0.66  | 0.4356 | 0.55  |
| ALH157 | 38.87 | -89.62  | surf | FO | 0.92  | 0.8464 | 1.37  |
| ANA115 | 42.42 | -83.9   | surf | FO | 0.89  | 0.7921 | 0.95  |
| BEL116 | 39.03 | -76.82  | surf | FO | 0.92  | 0.8464 | 0.73  |
| BWR139 | 38.44 | -76.11  | surf | FO | 0.97  | 0.9409 | 0.61  |
| CAD150 | 34.18 | -93.1   | surf | FO | 0.64  | 0.4096 | 1.62  |
| CAT175 | 41.94 | -74.55  | surf | FO | -     | -      | -     |
| CND125 | 35.26 | -79.84  | surf | FO | 0.81  | 0.6561 | 1.19  |
| COW137 | 35.06 | -83.43  | surf | FO | 0.09  | 0.0081 | 0.17  |
| CTH110 | 42.4  | -76.65  | surf | FO | 0.87  | 0.7569 | 0.67  |
| ESP127 | 36.04 | -85.73  | surf | FO | 0.76  | 0.5776 | 1.31  |
| GLR468 | 48.51 | -114    | surf | FO | 0.94  | 0.8836 | 0.69  |
| GRC474 | 36.06 | -112.18 | surf | FO | 0.98  | 0.9604 | 0.89  |
| GRS420 | 35.63 | -83.94  | surf | FO | 0.94  | 0.8836 | 1.31  |
| HOW132 | 45.22 | -68.71  | surf | FO | 0.65  | 0.4225 | 0.35  |
| HOX148 | 44.18 | -85.74  | surf | FO | 0.5   | 0.25   | 0.74  |
| HWF187 | 43.97 | -74.22  | surf | FO | 0.1   | 0.01   | 0.09  |
| LAV410 | 40.54 | -121.58 | surf | FO | -0.03 | 0.0009 | -0.04 |
| LRL117 | 39.99 | -79.25  | surf | FO | 0.79  | 0.6241 | 0.87  |
| NCS415 | 48.54 | -121.45 | surf | FO | 0.75  | 0.5625 | 0.58  |
| OLY421 | 48.1  | -123.43 | surf | FO | -     | -      | -     |
| PNF126 | 36.11 | -82.05  | surf | FO | 0.79  | 0.6241 | 1.3   |
| ROM406 | 40.28 | -105.55 | surf | FO | 0.69  | 0.4761 | 2.42  |
| SUM156 | 30.11 | -84.99  | surf | FO | 0.15  | 0.0225 | 0.28  |
| VOY413 | 48.41 | -92.83  | surf | FO | 0.96  | 0.9216 | 0.7   |
| WEL149 | 44.22 | -85.82  | surf | FO | 0.73  | 0.5329 | 0.94  |
| YOS404 | 37.71 | -119.7  | surf | FO | -0.55 | 0.3025 | -0.39 |
|        |       |         |      |    |       |        |       |

**Statistics for O3 dry deposition flux at CROP sites**

| Site code | Site Lat | Site Lon | Parameter | LCC | R-value | r^2    | Slope |
|-----------|----------|----------|-----------|-----|---------|--------|-------|
| ABT147    | 41.84    | -72.01   | flux      | CR  | 0.94    | 0.8836 | 0.77  |
| ANL146    | 41.7     | -87.99   | flux      | CR  | 0.97    | 0.9409 | 1.27  |
| ARE128    | 39.92    | -77.31   | flux      | CR  | 0.98    | 0.9604 | 0.8   |
| ASH135    | 46.6     | -68.41   | flux      | CR  | 0.93    | 0.8649 | 1.43  |
| BFT142    | 34.88    | -76.62   | flux      | CR  | 0.97    | 0.9409 | 0.73  |
| BVL130    | 40.05    | -88.37   | flux      | CR  | 0.91    | 0.8281 | 2.16  |

|        |       |        |      |    |      |        |      |
|--------|-------|--------|------|----|------|--------|------|
| CDZ171 | 36.78 | -87.85 | flux | CR | 0.98 | 0.9604 | 1.43 |
| CHE185 | 35.75 | -94.67 | flux | CR | 0.96 | 0.9216 | 1.32 |
| CKT136 | 37.92 | -83.07 | flux | CR | 0.97 | 0.9409 | 1.01 |
| DCP114 | 39.64 | -83.26 | flux | CR | 0.97 | 0.9409 | 1.21 |
| EGB181 | 44.23 | -79.78 | flux | CR | -    | -      | -    |
| GAS153 | 33.18 | -84.41 | flux | CR | 0.98 | 0.9604 | 1.42 |
| LYK123 | 40.92 | -83    | flux | CR | 0.96 | 0.9216 | 1.08 |
| MAC426 | 37.13 | -86.14 | flux | CR | 0.93 | 0.8649 | 1.22 |
| OXF122 | 39.53 | -84.72 | flux | CR | 0.97 | 0.9409 | 1.19 |
| PBF129 | 37.68 | -84.97 | flux | CR | 0.95 | 0.9025 | 1.16 |
| PSU106 | 40.72 | -77.93 | flux | CR | 0.91 | 0.8281 | 1.19 |
| QAK172 | 39.94 | -81.34 | flux | CR | 0.97 | 0.9409 | 0.86 |
| SAL133 | 40.82 | -85.66 | flux | CR | 0.97 | 0.9409 | 1.5  |
| SPD111 | 36.47 | -83.83 | flux | CR | 0.97 | 0.9409 | 1.31 |
| UVL124 | 43.61 | -83.36 | flux | CR | 0.94 | 0.8836 | 2.42 |
| VIN140 | 38.74 | -87.48 | flux | CR | 0.98 | 0.9604 | 1.53 |
|        |       |        |      |    |      |        |      |

#### Statistics for O3 dry deposition velocity at CROP sites

| Site code | Site Lat | Site Lon | Parameter | LCC | R-value | r^2    | Slope |
|-----------|----------|----------|-----------|-----|---------|--------|-------|
| ABT147    | 41.84    | -72.01   | dvel      | CR  | 0.88    | 0.7744 | 0.7   |
| ANL146    | 41.7     | -87.99   | dvel      | CR  | 0.91    | 0.8281 | 0.93  |
| ARE128    | 39.92    | -77.31   | dvel      | CR  | 0.93    | 0.8649 | 0.76  |
| ASH135    | 46.6     | -68.41   | dvel      | CR  | 0.88    | 0.7744 | 1     |
| BFT142    | 34.88    | -76.62   | dvel      | CR  | 0.69    | 0.4761 | 0.23  |
| BVL130    | 40.05    | -88.37   | dvel      | CR  | 0.66    | 0.4356 | 1.17  |
| CDZ171    | 36.78    | -87.85   | dvel      | CR  | 0.89    | 0.7921 | 0.92  |
| CHE185    | 35.75    | -94.67   | dvel      | CR  | 0.97    | 0.9409 | 0.67  |
| CKT136    | 37.92    | -83.07   | dvel      | CR  | 0.82    | 0.6724 | 0.52  |
| DCP114    | 39.64    | -83.26   | dvel      | CR  | 0.92    | 0.8464 | 0.89  |
| EGB181    | 44.23    | -79.78   | dvel      | CR  | -       | -      | -     |
| GAS153    | 33.18    | -84.41   | dvel      | CR  | 0.76    | 0.5776 | 0.51  |
| LYK123    | 40.92    | -83      | dvel      | CR  | 0.85    | 0.7225 | 0.76  |
| MAC426    | 37.13    | -86.14   | dvel      | CR  | 0.75    | 0.5625 | 0.59  |
| OXF122    | 39.53    | -84.72   | dvel      | CR  | 0.85    | 0.7225 | 0.81  |
| PBF129    | 37.68    | -84.97   | dvel      | CR  | 0.81    | 0.6561 | 0.63  |
| PSU106    | 40.72    | -77.93   | dvel      | CR  | 0.7     | 0.49   | 0.76  |
| QAK172    | 39.94    | -81.34   | dvel      | CR  | 0.91    | 0.8281 | 0.71  |
| SAL133    | 40.82    | -85.66   | dvel      | CR  | 0.87    | 0.7569 | 1.09  |
| SPD111    | 36.47    | -83.83   | dvel      | CR  | 0.79    | 0.6241 | 0.5   |
| UVL124    | 43.61    | -83.36   | dvel      | CR  | 0.8     | 0.64   | 1.82  |
| VIN140    | 38.74    | -87.48   | dvel      | CR  | 0.9     | 0.81   | 1.03  |
|           |          |          |           |     |         |        |       |

#### Statistics for surface O3 at CROP sites

| Site code | Site Lat | Site Lon | Parameter | LCC | R-value | r^2    | Slope |
|-----------|----------|----------|-----------|-----|---------|--------|-------|
| ABT147    | 41.84    | -72.01   | surf      | CR  | 0.82    | 0.6724 | 0.58  |
| ANL146    | 41.7     | -87.99   | surf      | CR  | 0.96    | 0.9216 | 1     |
| ARE128    | 39.92    | -77.31   | surf      | CR  | 0.95    | 0.9025 | 0.66  |
| ASH135    | 46.6     | -68.41   | surf      | CR  | 0.56    | 0.3136 | 0.31  |
| BFT142    | 34.88    | -76.62   | surf      | CR  | 0.62    | 0.3844 | 0.81  |
| BVL130    | 40.05    | -88.37   | surf      | CR  | 0.91    | 0.8281 | 1.12  |
| CDZ171    | 36.78    | -87.85   | surf      | CR  | 0.9     | 0.81   | 1.24  |
| CHE185    | 35.75    | -94.67   | surf      | CR  | 0.79    | 0.6241 | 1.89  |

|        |       |        |      |    |      |        |      |
|--------|-------|--------|------|----|------|--------|------|
| CKT136 | 37.92 | -83.07 | surf | CR | 0.88 | 0.7744 | 1.25 |
| DCP114 | 39.64 | -83.26 | surf | CR | 0.92 | 0.8464 | 1.05 |
| EGB181 | 44.23 | -79.78 | surf | CR | nan  |        | nan  |
| GAS153 | 33.18 | -84.41 | surf | CR | 0.79 | 0.6241 | 1.45 |
| LYK123 | 40.92 | -83    | surf | CR | 0.93 | 0.8649 | 0.99 |
| MAC426 | 37.13 | -86.14 | surf | CR | 0.83 | 0.6889 | 1.25 |
| OXF122 | 39.53 | -84.72 | surf | CR | 0.93 | 0.8649 | 1.03 |
| PBF129 | 37.68 | -84.97 | surf | CR | 0.81 | 0.6561 | 1.09 |
| PSU106 | 40.72 | -77.93 | surf | CR | 0.85 | 0.7225 | 0.78 |
| QAK172 | 39.94 | -81.34 | surf | CR | 0.91 | 0.8281 | 0.87 |
| SAL133 | 40.82 | -85.66 | surf | CR | 0.91 | 0.8281 | 1.1  |
| SPD111 | 36.47 | -83.83 | surf | CR | 0.78 | 0.6084 | 1.35 |
| UVL124 | 43.61 | -83.36 | surf | CR | 0.85 | 0.7225 | 1.02 |
| VIN140 | 38.74 | -87.48 | surf | CR | 0.9  | 0.81   | 1.16 |
|        |       |        |      |    |      |        |      |

#### Statistics for O3 dry deposition flux at GRASS LAND sites

| Site code | Site Lat | Site Lon | Parameter | LCC | R-value | r^2    | Slope |
|-----------|----------|----------|-----------|-----|---------|--------|-------|
| ALC188    | 30.7     | -94.67   | flux      | GS  | 0.66    | 0.4356 | 0.92  |
| PAL190    | 34.88    | -101.66  | flux      | GS  | 0.82    | 0.6724 | 1.43  |
| WNC429    | 43.56    | -103.48  | flux      | GS  | 0.96    | 0.9216 | 1.69  |
| YEL408    | 44.57    | -110.4   | flux      | GS  | 0.95    | 0.9025 | 2.45  |
|           |          |          |           |     |         |        |       |

#### Statistics for O3 dry deposition velocity at GRASS LAND sites

| Site code | Site Lat | Site Lon | Parameter | LCC | R-value | r^2    | Slope |
|-----------|----------|----------|-----------|-----|---------|--------|-------|
| ALC188    | 30.7     | -94.67   | dvel      | GS  | 0.85    | 0.7225 | 0.75  |
| PAL190    | 34.88    | -101.66  | dvel      | GS  | 0.52    | 0.2704 | 0.33  |
| WNC429    | 43.56    | -103.48  | dvel      | GS  | 0.88    | 0.7744 | 1.43  |
| YEL408    | 44.57    | -110.4   | dvel      | GS  | 0.93    | 0.8649 | 2.19  |
|           |          |          |           |     |         |        |       |

#### Statistics for surface O3 at GRASS LAND sites

| Site code | Site Lat | Site Lon | Parameter | LCC | R-value | r^2    | Slope |
|-----------|----------|----------|-----------|-----|---------|--------|-------|
| ALC188    | 30.7     | -94.67   | surf      | GS  | 0.29    | 0.0841 | 0.46  |
| PAL190    | 34.88    | -101.66  | surf      | GS  | 0.96    | 0.9216 | 1.5   |
| WNC429    | 43.56    | -103.48  | surf      | GS  | 0.94    | 0.8836 | 2.08  |
| YEL408    | 44.57    | -110.4   | surf      | GS  | 0.54    | 0.2916 | 1.24  |
|           |          |          |           |     |         |        |       |

#### Statistics for O3 dry deposition flux at SHRUB/DESERT sites

| Site code | Site Lat | Site Lon | Parameter | LCC | R-value | r^2    | Slope |
|-----------|----------|----------|-----------|-----|---------|--------|-------|
| CAN407    | 38.46    | -109.82  | flux      | DS  | 0.31    | 0.0961 | 0.05  |
| DEV412    | 36.51    | -116.85  | flux      | DS  | -0.32   | 0.1024 | -0.09 |
| JOT403    | 34.07    | -116.39  | flux      | DS  | -0.46   | 0.2116 | -0.13 |
| PET427    | 34.82    | -109.89  | flux      | DS  | -0.29   | 0.0841 | -0.03 |
| BBE401    | 29.3     | -103.18  | flux      | SH  | 0.03    | 0.0009 | 0.01  |
| CHA467    | 32.01    | -109.39  | flux      | SH  | -0.22   | 0.0484 | -0.09 |
| CON186    | 34.19    | -116.91  | flux      | SH  | -0.61   | 0.3721 | -0.12 |
| GRB411    | 39.01    | -114.22  | flux      | SH  | 0.69    | 0.4761 | 0.12  |
| GTH161    | 38.96    | -106.99  | flux      | SH  | 0.95    | 0.9025 | 0.89  |
| MEV405    | 37.2     | -108.49  | flux      | SH  | 0.91    | 0.8281 | 0.22  |
| PIN414    | 36.48    | -121.16  | flux      | SH  | -0.5    | 0.25   | -0.09 |
| PND165    | 42.93    | -109.79  | flux      | SH  | 0.92    | 0.8464 | 0.97  |

|        |       |         |      |    |       |        |       |
|--------|-------|---------|------|----|-------|--------|-------|
| RCK163 | 43.21 | -116.75 | flux | SH | 0.91  | 0.8281 | 0.29  |
| SAN189 | 42.83 | -97.85  | flux | SH | 0.96  | 0.9216 | 1.11  |
| SAV164 | 41.29 | -115.86 | flux | SH | -0.37 | 0.1369 | -0.03 |
| SEK430 | 36.49 | -118.83 | flux | SH | -0.54 | 0.2916 | -0.05 |
| THR422 | 46.89 | -103.38 | flux | SH | 0.95  | 0.9025 | 2.05  |
| UIN162 | 40.55 | -110.32 | flux | SH | 0.91  | 0.8281 | 0.22  |
| WSP144 | 40.31 | -74.87  | flux | SH | 0.97  | 0.9409 | 0.68  |
|        |       |         |      |    |       |        |       |

**Statistics for O3 dry deposition velocity at SHRUB/DESERT sites**

| Site code | Site Lat | Site Lon | Parameter | LCC | R-value | r^2    | Slope |
|-----------|----------|----------|-----------|-----|---------|--------|-------|
| CAN407    | 38.46    | -109.82  | dvel      | DS  | -0.8    | 0.64   | -0.09 |
| DEV412    | 36.51    | -116.85  | dvel      | DS  | -0.36   | 0.1296 | -0.16 |
| JOT403    | 34.07    | -116.39  | dvel      | DS  | -0.14   | 0.0196 | -0.05 |
| PET427    | 34.82    | -109.89  | dvel      | DS  | -0.75   | 0.5625 | -0.04 |
| BBE401    | 29.3     | -103.18  | dvel      | SH  | -0.27   | 0.0729 | -0.02 |
| CHA467    | 32.01    | -109.39  | dvel      | SH  | -0.82   | 0.6724 | -0.18 |
| CON186    | 34.19    | -116.91  | dvel      | SH  | -0.43   | 0.1849 | -0.08 |
| GRB411    | 39.01    | -114.22  | dvel      | SH  | -0.52   | 0.2704 | -0.07 |
| GTH161    | 38.96    | -106.99  | dvel      | SH  | 0.8     | 0.64   | 0.36  |
| MEV405    | 37.2     | -108.49  | dvel      | SH  | -0.64   | 0.4096 | -0.07 |
| PIN414    | 36.48    | -121.16  | dvel      | SH  | -0.53   | 0.2809 | -0.03 |
| PND165    | 42.93    | -109.79  | dvel      | SH  | 0.8     | 0.64   | 0.8   |
| RCK163    | 43.21    | -116.75  | dvel      | SH  | 0.77    | 0.5929 | 0.16  |
| SAN189    | 42.83    | -97.85   | dvel      | SH  | 0.86    | 0.7396 | 0.75  |
| SAV164    | 41.29    | -115.86  | dvel      | SH  | -0.85   | 0.7225 | -0.03 |
| SEK430    | 36.49    | -118.83  | dvel      | SH  | 0.07    | 0.0049 | 0     |
| THR422    | 46.89    | -103.38  | dvel      | SH  | 0.93    | 0.8649 | 2.16  |
| UIN162    | 40.55    | -110.32  | dvel      | SH  | 0.74    | 0.5476 | 0.09  |
| WSP144    | 40.31    | -74.87   | dvel      | SH  | 0.93    | 0.8649 | 0.56  |
|           |          |          |           |     |         |        |       |

**Statistics for surface O3 at SHRUB/DESERT sites**

| Site code | Site Lat | Site Lon | Parameter | LCC | R-value | r^2    | Slope |
|-----------|----------|----------|-----------|-----|---------|--------|-------|
| CAN407    | 38.46    | -109.82  | surf      | DS  | 0.92    | 0.8464 | 0.67  |
| DEV412    | 36.51    | -116.85  | surf      | DS  | -0.09   | 0.0081 | -0.05 |
| JOT403    | 34.07    | -116.39  | surf      | DS  | -0.4    | 0.16   | -0.28 |
| PET427    | 34.82    | -109.89  | surf      | DS  | 0.37    | 0.1369 | 0.24  |
| BBE401    | 29.3     | -103.18  | surf      | SH  | 0.59    | 0.3481 | 0.56  |
| CHA467    | 32.01    | -109.39  | surf      | SH  | 0.36    | 0.1296 | 0.37  |
| CON186    | 34.19    | -116.91  | surf      | SH  | -0.56   | 0.3136 | -0.37 |
| GRB411    | 39.01    | -114.22  | surf      | SH  | 0.96    | 0.9216 | 0.87  |
| GTH161    | 38.96    | -106.99  | surf      | SH  | -0.07   | 0.0049 | -0.19 |
| MEV405    | 37.2     | -108.49  | surf      | SH  | 0.94    | 0.8836 | 1.27  |
| PIN414    | 36.48    | -121.16  | surf      | SH  | -0.14   | 0.0196 | -0.12 |
| PND165    | 42.93    | -109.79  | surf      | SH  | 0.82    | 0.6724 | 1.83  |
| RCK163    | 43.21    | -116.75  | surf      | SH  | 0.91    | 0.8281 | 0.94  |
| SAN189    | 42.83    | -97.85   | surf      | SH  | 0.89    | 0.7921 | 1.83  |
| SAV164    | 41.29    | -115.86  | surf      | SH  | 0.63    | 0.3969 | 0.47  |
| SEK430    | 36.49    | -118.83  | surf      | SH  | -0.64   | 0.4096 | -0.22 |
| THR422    | 46.89    | -103.38  | surf      | SH  | 0.96    | 0.9216 | 1.24  |
| UIN162    | 40.55    | -110.32  | surf      | SH  | 0.69    | 0.4761 | 1.21  |
| WSP144    | 40.31    | -74.87   | surf      | SH  | 0.93    | 0.8649 | 0.67  |
