# Supplementary material for: An evaluation of ozone dry deposition in global scale chemistry climate models
Source: Copernicus journal article supplement (doi:10.5194/acp-15-6419-2015), 2015-06-12
Supplement: Supplementary file 2 [file acp-15-6419-2015-supplement.zip]

| Model           | Status of deposition scheme | Reference                                       | Land cover classes                                                                                                                                                                                                                                                                                                                                                                                                                                                              | Reference                                   |
|-----------------|-----------------------------|-------------------------------------------------|---------------------------------------------------------------------------------------------------------------------------------------------------------------------------------------------------------------------------------------------------------------------------------------------------------------------------------------------------------------------------------------------------------------------------------------------------------------------------------|---------------------------------------------|
| CAMCHEM         | Wesely, updated             | Walmsley et al., 1996<br>Wesely and Hicks, 2000 | Desert, Ice and ocean; Needleleaf evergreen temperate tree; Needleleaf evergreen boreal tree; Needleleaf deciduous temperate tree; Broadleaf evergreen tropical tree; Broadleaf evergreen temperate tree; Broadleaf deciduous tropical tree; Broadleaf deciduous temperate tree; Broadleaf deciduous boreal tree; Broadleaf evergreen shrub; Broadleaf deciduous temperate shrub; Broadleaf deciduous boreal shrub; C3 arctic grass; C3 non-arctic grass; C4 grass; Corn; Wheat | See the main model citation                 |
| CHASER-v03      | Wesely, updated             | Updates not specified                           | Includes tropical forest                                                                                                                                                                                                                                                                                                                                                                                                                                                        | See the main model citation                 |
| FRSGC/UCI-v01   | Wesely, updated             | Updates not specified                           | Water, Desert, Snow and ice, Deciduous forest, Coniferous forest, Tropical forest, Tundra, Grass, Crop                                                                                                                                                                                                                                                                                                                                                                          | See the main model citation                 |
| GEMAQ-EC        | Wesely, updated             | Updates not specified                           | Includes snow cover                                                                                                                                                                                                                                                                                                                                                                                                                                                             | See the main model citation                 |
| GEOSChem-v07    | Wesely, updated             | Wang et al., 1998                               | Snow/Ice; Deciduous forest; Coniferous forest; Agricultural land; Shrub/grassland; Amazon forest; Tundra, Desert; Wetland; Urban; Water.<br><br>Olson land cover data (1992 data set--74 ICCs, 2001 data set--96 LCCs) is mapped to the 11 LCCs described by Wesely et al., (1989). Further information is available at:<br><a href="http://acmg.seas.harvard.edu/geos/">http://acmg.seas.harvard.edu/geos/</a>                                                                 | See the main model citation                 |
| GISS-PUCCINI    | Wesely                      | Updates not specified                           | Forest, Tropical forest, Woodland, Shrubland, Grassland, Tundra, Desert, Cultivation                                                                                                                                                                                                                                                                                                                                                                                            | Chin et al., 1996,<br>Matthews et al., 1983 |
| GMI-v02f        | Wesely, updated             | Wang et al., 1998                               |                                                                                                                                                                                                                                                                                                                                                                                                                                                                                 |                                             |
| INCA-vSSz       | Wesely, updated             | Updates not specified                           | Evergreen needleleaf forest; Evergreen broadleaf forest; Deciduous needleleaf forest; Deciduous broadleaf forest; Mixed forest; Woodlands; Wooded grasslands/shrublands; Closed bushlands or shrublands; Open Shrublands; Grasses; Croplands                                                                                                                                                                                                                                    | DeFries et al., 1998                        |
| LLNL-IMPACT-T5a | Wesely, updated             | Wang et al., 1998                               | Snow/Ice; Deciduous forest; Coniferous forest; Agricultural land; Shrub/grassland; Amazon forest; Tundra; Desert; Wetland; Urban; Water; Tropical                                                                                                                                                                                                                                                                                                                               | See the main model citation                 |

|                     |                 |                                                                                                                   |                                                                                                                                                                                                                                              |                                                                |
|---------------------|-----------------|-------------------------------------------------------------------------------------------------------------------|----------------------------------------------------------------------------------------------------------------------------------------------------------------------------------------------------------------------------------------------|----------------------------------------------------------------|
|                     |                 |                                                                                                                   | forests; Tundra                                                                                                                                                                                                                              |                                                                |
| MOZARTGFDL-v2       | Wesely, updated | Updates not specified                                                                                             | Evergreen needleleaf forest; Evergreen broadleaf forest; Deciduous needleleaf forest; Deciduous broadleaf forest; Mixed forest; Woodlands; Wooded grasslands/shrublands; Closed bushlands or shrublands; Open Shrublands; Grasses; Croplands | See the main model citation                                    |
| STOC-HadAM3-v01     |                 |                                                                                                                   | Water; Urban; Snow/Ice; Bare soil; Deciduous forest; Coniferous forest; C3 grass; C4 grass; Shrub                                                                                                                                            | See the main model citation                                    |
| STOCHEM-v02         |                 |                                                                                                                   | Water; Urban; Snow/Ice; Bare soil; Deciduous forest; Coniferous forest; C3 grass; C4 grass; Shrub                                                                                                                                            | See the main model citation                                    |
| TM5-JRC-cy2-ipcc-v1 | Wesely, updated | Ganzeveld et al., 1995, <a href="http://tm.knmi.nl/index.php/Main_Page">http://tm.knmi.nl/index.php/Main_Page</a> | Snow and Ice, Water, Soil, Vegetation                                                                                                                                                                                                        | See the main model citation                                    |
| ULAQ-v02            |                 |                                                                                                                   |                                                                                                                                                                                                                                              |                                                                |
| UM-CAM-v01          | Hough           | Zeng et al., 2008                                                                                                 | Water, Forest, Grass/Shrub, Soil, Snow/Ice                                                                                                                                                                                                   | Land type is defined by the model calculated roughness length. |

Notes on this table:

1. We have tried to locate information on the dry deposition scheme used in each model, details if it has been updated and in what way, as well as the land cover scheme used in the model.
2. Where it was given in the main reference for each model (see Table 1 in the main publication), a citation for the deposition scheme updates has been provided
3. Where it was given in the main reference for each model (see Table 1 in the main publication), a citation for the land cover classification has been provided.
4. We were not able to find or locate definitive information about the deposition scheme or the land cover used in the ULAQ model.
5. Not all models provided definitive information about the LAI scheme used. Generally these models used either a satellite derived data set, a

prescribed LAI data set or LAI that is calculated as a function of ecosystem type.

### **Additional References**

Chin et al., 1996,

DeFries1998

Ganzeveld et al., 1995,

Matthews et al., 1983

Walmsley et al., 1996

Wang, Y., D. J. Jacob, and J. A. Logan (1998), Global simulation of tropospheric O<sub>3</sub>-NO<sub>x</sub> -hydrocarbon chemistry: 1. Model formulation, J. Geophys. Res., 103(D9), 10713-10725, doi:10.1029/98JD00158.

Wesely, M. L. and Hicks, B. B.: A review of the current status of knowledge on dry deposition, Atmos. Environ., 34, 2261—2282, doi:10.1016/S1352-2310(99)00467-7, 2000.

Zeng et al., 2008
