# Supplementary material for: An evaluation of ozone dry deposition in global scale chemistry climate models
Source: Copernicus journal article supplement (doi:10.5194/acp-15-6419-2015), 2015-06-12
Supplement: Supplementary file 3 [file acp-15-6419-2015-supplement.zip]

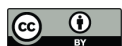

## *Supplement of*

# **An evaluation of ozone dry deposition in global scale chemistry climate models**

**C. Hardacre et al.**

*Correspondence to:* O. Wild ([o.wild@lancaster.ac.uk](mailto:o.wild@lancaster.ac.uk))

- [acp-15-6419-2015-supplement-cover-letter.pdf](#)
- supplementary
  - [SUPP03\\_castnet\\_htap\\_site\\_stats.pdf](#)
  - [Supp02\\_ModelInfo.pdf](#)
  - [supp01.eps](#)

The copyright of individual parts of the supplement might differ from the CC-BY 3.0 licence.
